# Supplementary material for: β-Asarone increases doxorubicin sensitivity by suppressing NF-κB signaling and abolishes doxorubicin-induced enrichment of stem-like population by destabilizing Bmi1
Source: Springer Nature journal article supplement (doi:10.1186/s12935-019-0873-3), 2019-06-03
Supplement: MOESM1 [file 16768012]

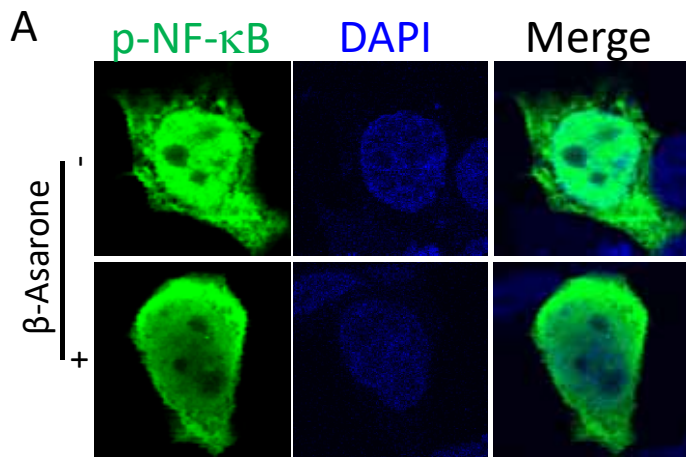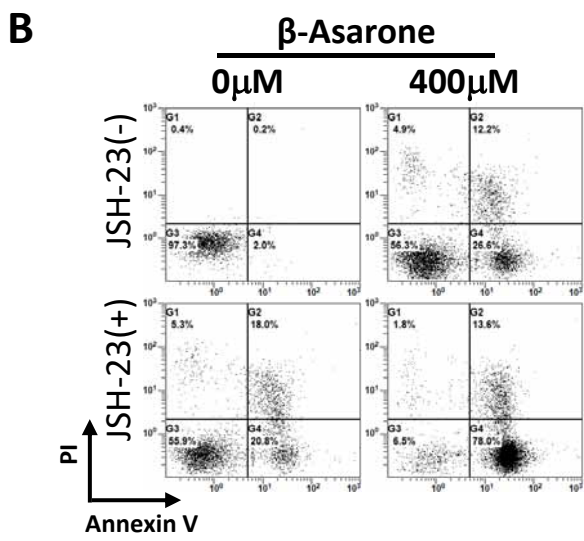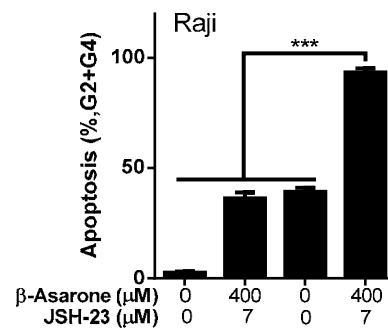

Fig. S1
